# Supplementary material for: MicroRNA-mRNA Co-sequencing Identifies Transcriptional and Post-transcriptional Regulatory Networks Underlying Muscle Wasting in Cancer Cachexia
Source: Preprints.org preprint supplement (doi:10.20944/preprints201909.0004.v1), 2019-09-01
Supplement: Supplementary file 1 [file supplementary]

## Sheet: Sheet1
id	geneSymbol	log2FoldChange	FDR	Cluster
ENSMUSG00000086320	Gm12840	0.629239	0.00818924	I
ENSMUSG00000018733	Pex12	1.42421	2.32058e-12	I
ENSMUSG00000033323	Ctdp1	0.747321	0.000376309	I
ENSMUSG00000036391	Sec24a	1.19322	0.000707602	I
ENSMUSG00000015522	Arnt	-2.96858	1.25651e-14	I
ENSMUSG00000026203	Dnajb2	3.13276	5.84246e-06	I
ENSMUSG00000029415	Sdad1	0.913554	5.34338e-05	I
ENSMUSG00000050071	Bex1	1.07275	0.00335992	I
ENSMUSG00000040562	Gstm2	-0.780058	0.0015869	I
ENSMUSG00000028954	Nub1	-0.889276	4.39112e-05	I
ENSMUSG00000002307	Daxx	-2.22685	2.50111e-30	I
ENSMUSG00000029657	Hsph1	-1.06625	5.91112e-05	I
ENSMUSG00000050244	Heatr1	0.651041	0.00339736	I
ENSMUSG00000025220	Mgea5	1.2775	1.99672e-06	I
ENSMUSG00000023460	Rab12	1.0273	3.60547e-07	I
ENSMUSG00000030521	Mphosph10	1.01042	9.449e-05	I
ENSMUSG00000008305	Tle1	3.19777	6.34219e-18	I
ENSMUSG00000021904	Sema3g	-1.43684	1.12234e-08	I
ENSMUSG00000022364	Tbc1d31	1.05616	5.4538e-08	I
ENSMUSG00000020722	Cacng1	1.26072	4.76869e-10	I
ENSMUSG00000026234	Ncl	-1.14689	5.90384e-06	I
ENSMUSG00000025579	Gaa	-1.75808	3.07349e-06	I
ENSMUSG00000042726	Trafd1	0.864283	0.00208659	I
ENSMUSG00000033159	Cnppd1	0.787231	0.000347212	I
ENSMUSG00000031889	D230025D16Rik	-0.785835	0.000191203	I
ENSMUSG00000048756	Foxo3	-0.701021	0.00319041	I
ENSMUSG00000036099	Vezt	1.16435	0.000680654	I
ENSMUSG00000022358	Fbxo32	-1.02354	5.44155e-08	I
ENSMUSG00000029014	Dnajc2	1.1964	4.65619e-05	I
ENSMUSG00000030189	Ybx3	0.874976	7.54453e-05	I
ENSMUSG00000031812	Map1lc3b	0.78371	0.000181445	I
ENSMUSG00000034457	Eda2r	0.99946	0.000526837	I
ENSMUSG00000023944	Hsp90ab1	-0.95376	4.83009e-07	I
ENSMUSG00000006998	Psmd2	1.9883	9.42317e-19	I
ENSMUSG00000031370	Zrsr2	0.793829	0.000134352	I
ENSMUSG00000024528	Srfbp1	-2.04184	9.92035e-07	I
ENSMUSG00000024042	Sik1	-0.993878	5.95976e-07	I
ENSMUSG00000086765	Gm11827	0.614921	0.00824715	I
ENSMUSG00000017999	Ddx27	1.49609	8.89007e-13	I
ENSMUSG00000033793	Atp6v1h	0.766081	0.000453454	I
ENSMUSG00000018143	Mafk	1.43327	1.04493e-12	I
ENSMUSG00000026436	Elk4	-1.30907	7.52241e-06	I
ENSMUSG00000074794	Arrdc3	-0.70642	0.00732721	I
ENSMUSG00000025793	Hgs	-2.20862	3.99889e-06	I
ENSMUSG00000031762	Mt2	0.936385	0.000170546	I
ENSMUSG00000031765	Mt1	4.21404	0.000170546	I
ENSMUSG00000002831	Plin4	2.75966	3.86937e-28	I
ENSMUSG00000038332	Sesn1	0.899366	0.00102988	I
ENSMUSG00000021273	Fdft1	-1.13388	3.37539e-09	I
ENSMUSG00000026473	Glul	-0.995086	7.85107e-06	I
ENSMUSG00000030087	Klf15	-0.887929	7.00309e-05	I
ENSMUSG00000058799	Nap1l1	-0.764482	0.00525535	I
ENSMUSG00000030739	Myh14	-1.50574	0.000103822	I
ENSMUSG00000021477	Ctsl	1.22875	4.29725e-09	I
ENSMUSG00000019923	Zwint	-1.28902	2.12996e-11	I
ENSMUSG00000049800	Sertad2	1.41667	0.00334617	I
ENSMUSG00000020706	Ftsj3	1.43898	3.90735e-10	I
ENSMUSG00000030595	Nfkbib	-0.798557	9.76812e-05	I
ENSMUSG00000039703	Nploc4	0.72937	0.00137954	I
ENSMUSG00000036693	Nop14	-1.24634	0.000730216	I
ENSMUSG00000032078	Zpr1	-1.00588	0.000231521	I
ENSMUSG00000017428	Psmd11	-1.31547	2.71668e-13	I
ENSMUSG00000007029	Vars	1.76081	9.90947e-19	I
ENSMUSG00000030603	Psmc4	1.28853	9.99085e-05	I
ENSMUSG00000028834	Trim63	0.82901	3.4428e-05	I
ENSMUSG00000031490	Eif4ebp1	0.818373	0.000152914	I
ENSMUSG00000036390	Gadd45a	1.11314	0.000707602	I
ENSMUSG00000045795	Whamm	-0.647636	0.00270615	I
ENSMUSG00000042354	Gnl3	-1.12048	0.00201556	I
ENSMUSG00000027597	Ahcy	-1.1085	2.15567e-05	I
ENSMUSG00000041096	Tspyl2	-0.774734	0.0017215	I
ENSMUSG00000029994	Anxa4	-1.57852	6.60176e-05	I
ENSMUSG00000086918	4930429F24Rik	0.593807	0.00841765	I
ENSMUSG00000006205	Htra1	2.06008	7.06784e-20	I
ENSMUSG00000028862	Map3k6	-1.55945	3.79293e-05	I
ENSMUSG00000019842	Traf3ip2	1.31327	1.50164e-11	I
ENSMUSG00000079139	Gm4204	-1.05373	0.00772997	I
ENSMUSG00000019132	BC005537	-1.44261	4.35028e-12	I
ENSMUSG00000028124	Gclm	-1.29571	2.64505e-05	I
ENSMUSG00000024052	Lpin2	-1.05269	6.18985e-07	I
ENSMUSG00000041057	Wdr43	-0.671926	0.00171427	I
ENSMUSG00000057113	Npm1	-1.15786	0.00484452	I
ENSMUSG00000039756	Dnttip2	0.960501	0.00140335	I
ENSMUSG00000022091	Sorbs3	1.10404	2.36933e-08	I
ENSMUSG00000041775	Mapk1ip1	-0.742304	0.00192021	I
ENSMUSG00000040170	Fmo2	-0.827398	0.00149136	I
ENSMUSG00000030852	Tacc2	Inf	0.00011202	I
ENSMUSG00000035247	Hectd1	-0.686846	0.000587424	I
ENSMUSG00000037470	Uggt1	-0.769554	0.000879622	I
ENSMUSG00000037447	Arid5a	-0.935583	0.000874718	I
ENSMUSG00000031904	Slc7a6	0.798203	0.000191922	I
ENSMUSG00000020364	Zfp354a	-1.74572	1.41134e-10	I
ENSMUSG00000041777	Cir1	-0.681648	0.00192583	I
ENSMUSG00000042622	Maff	-1.21823	0.00206197	I
ENSMUSG00000020611	Gna13	1.35521	2.67038e-10	I
ENSMUSG00000002265	Peg3	4.18963	9.29856e-31	I
ENSMUSG00000054717	Hmgb2	-1.14554	0.00411775	I
ENSMUSG00000028869	Gnl2	0.94064	3.79972e-05	I
ENSMUSG00000006920	Ezh1	-5.15359	9.39309e-19	I
ENSMUSG00000030870	Ubfd1	1.99945	0.00011313	I
ENSMUSG00000059890	Ube4a	-0.631765	0.00555133	I
ENSMUSG00000024423	Impact	1.28325	9.56612e-07	I
ENSMUSG00000002769	Gnmt	2.81121	6.38349e-29	I
ENSMUSG00000073375	Lrrc30	0.743296	0.00682037	I
ENSMUSG00000075225	Ccdc162	-0.817698	0.00736383	I
ENSMUSG00000028854	Slc9a1	-0.975116	3.64702e-05	I
ENSMUSG00000087528	9830144P21Rik	-0.589124	0.00897099	I
ENSMUSG00000028841	Cnksr1	-1.20604	3.51534e-05	I
ENSMUSG00000004393	Ddx56	1.8869	9.29888e-23	I
ENSMUSG00000031934	Panx1	0.774809	0.000209581	I
ENSMUSG00000025401	Myo1a	-0.901452	2.56855e-06	I
ENSMUSG00000097815	Gm26809	0.670508	0.00978107	I
ENSMUSG00000020130	Tbc1d15	-1.50267	8.67276e-11	I
ENSMUSG00000021431	Snrnp48	1.44149	4.22053e-09	I
ENSMUSG00000025337	Sbds	-1.05512	2.3821e-06	I
ENSMUSG00000026426	Arl8a	-0.933041	7.44121e-06	I
ENSMUSG00000021149	Gtpbp4	2.96584	1.65241e-09	I
ENSMUSG00000078566	Bnip3	-0.695269	0.00748094	I
ENSMUSG00000013539	Tango2	-1.59191	5.51954e-16	I
ENSMUSG00000072720	Myo18b	-0.829952	0.00665727	I
ENSMUSG00000028967	Errfi1	0.914082	4.39243e-05	I
ENSMUSG00000040136	Abcc8	1.08341	0.00146631	I
ENSMUSG00000022270	Retreg1	-1.30609	3.90771e-08	I
ENSMUSG00000031380	Vegfd	0.806585	0.000139067	I
ENSMUSG00000027947	Il6ra	-1.06698	2.29364e-05	I
ENSMUSG00000036452	Arhgap26	0.742082	0.000721568	I
ENSMUSG00000024222	Fkbp5	-1.10542	7.84634e-07	I
ENSMUSG00000023067	Cdkn1a	-1.04558	2.08936e-07	I
ENSMUSG00000026353	Ubxn4	-1.13145	5.99842e-06	I
ENSMUSG00000040471	Ggt6	0.713251	0.00156639	I
ENSMUSG00000020190	Mknk2	1.35434	1.04585e-10	I
ENSMUSG00000031360	Ctps2	0.786255	0.000129932	I
ENSMUSG00000024413	Npc1	0.994821	9.40887e-07	I
ENSMUSG00000039960	Rhou	0.730367	0.0014258	I
ENSMUSG00000044167	Foxo1	-0.704423	0.00256403	I
ENSMUSG00000052934	Fbxo31	0.65382	0.00387986	I
ENSMUSG00000020128	Vps54	1.27499	7.98217e-11	I
ENSMUSG00000038335	Tsr1	2.65641	0.00104427	I
ENSMUSG00000020075	Ddx21	3.93591	5.07271e-11	I
ENSMUSG00000006301	Tmbim1	-1.83824	1.06867e-19	I
ENSMUSG00000063808	Gpatch1	-0.723972	0.00604712	I
ENSMUSG00000031666	Rbl2	0.843365	0.000164421	I
ENSMUSG00000042719	Naa25	0.641344	0.00208659	I
ENSMUSG00000032238	Rora	0.809614	0.00024294	I
ENSMUSG00000027438	Napb	0.911634	1.94647e-05	I
ENSMUSG00000049550	Clip1	0.671805	0.00327999	I
ENSMUSG00000068742	Cry2	0.640005	0.00621103	I
ENSMUSG00000021215	Net1	1.81083	2.51471e-09	I
ENSMUSG00000017412	Cacnb4	-1.59876	1.85258e-13	I
ENSMUSG00000040809	Chil3	0.929499	0.00164978	I
ENSMUSG00000086564	Cd101	0.645508	0.00818924	I
ENSMUSG00000022952	Runx1	1.174	1.44966e-07	I
ENSMUSG00000031508	Ankrd10	-1.41131	0.000154063	I
ENSMUSG00000025225	Nfkb2	-1.00274	2.00001e-06	I
ENSMUSG00000020941	Map3k14	1.36612	1.25603e-09	I
ENSMUSG00000029683	Lmod2	-0.768487	6.20187e-05	I
ENSMUSG00000029769	Ccdc136	-0.783652	6.30545e-05	I
ENSMUSG00000002076	Hsf2bp	2.34741	3.43045e-31	I
ENSMUSG00000071392	Ect2l	-0.607783	0.00639637	I
ENSMUSG00000024908	Ppp6r3	-0.899619	1.46875e-06	I
ENSMUSG00000021709	Erbin	-1.21109	5.94694e-09	I
ENSMUSG00000074623	Gm826	0.778671	0.00728481	I
ENSMUSG00000034361	Cpne2	0.737563	0.000513362	I
ENSMUSG00000022094	Slc39a14	1.15676	2.46366e-08	I
ENSMUSG00000029816	Gpnmb	2.2867	6.55098e-05	I
ENSMUSG00000070056	Mfhas1	-0.736285	0.00633817	I
ENSMUSG00000020848	Doc2b	2.32181	7.03289e-10	I
ENSMUSG00000097357	Gm16793	-0.785108	0.00957974	I
ENSMUSG00000037185	Krt80	-0.762968	0.000836484	I
ENSMUSG00000037020	Wdr62	-0.718256	0.000775961	I
ENSMUSG00000039126	Prune2	-0.765062	0.00126329	I
ENSMUSG00000037542	Aldh8a1	-0.820604	0.000898835	I
ENSMUSG00000005686	Ampd3	-1.96844	8.40996e-21	I
ENSMUSG00000074577	Ripor3	0.887448	0.00721702	I
ENSMUSG00000028970	Abcb1b	0.82595	4.56035e-05	I
ENSMUSG00000062713	Sim2	2.20148	0.00588991	I
ENSMUSG00000098708	Gm27252	-0.805089	0.00978494	I
ENSMUSG00000041417	Pik3r1	-0.682744	0.00180897	I
ENSMUSG00000021751	Acox2	1.14574	7.03425e-09	I
ENSMUSG00000021481	Zfp346	1.20064	4.31646e-09	I
ENSMUSG00000032411	Tfdp2	-0.711667	0.000257384	I
ENSMUSG00000022105	Rb1	1.23985	3.06979e-08	I
ENSMUSG00000034158	Lrrc58	1.28275	0.000505321	I
ENSMUSG00000035105	Egln3	-1.15621	0.000582424	I
ENSMUSG00000038546	Ranbp9	1.17765	0.00114736	I
ENSMUSG00000064120	Mocs1	0.680286	0.00604712	I
ENSMUSG00000023243	Kcnk5	2.14422	2.66819e-07	I
ENSMUSG00000039911	Spsb1	0.6978	0.00141238	I
ENSMUSG00000071036	Gm10309	-0.835026	0.00639637	I
ENSMUSG00000028211	Trp53inp1	0.923471	2.6557e-05	I
ENSMUSG00000038178	Slc43a2	0.781921	0.000971861	I
ENSMUSG00000034898	Filip1	0.757882	0.000582335	I
ENSMUSG00000059149	Mfsd4a	0.779044	0.00543107	I
ENSMUSG00000042680	Garem1	-0.924971	0.00208659	I
ENSMUSG00000074971	Fibin	0.586328	0.00734603	I
ENSMUSG00000021091	Serpina3n	-1.71778	1.55918e-09	I
ENSMUSG00000087236	Kif28	1.41641	0.00859994	I
ENSMUSG00000027452	Acss1	-1.37485	2.05497e-05	I
ENSMUSG00000075033	Nxpe3	-1.17069	0.00736072	I
ENSMUSG00000024803	Ankrd1	-1.02183	1.46875e-06	I
ENSMUSG00000038259	Gdf5	0.913495	0.000985981	I
ENSMUSG00000015243	Abca1	-1.57322	4.23193e-15	I
ENSMUSG00000022533	Atp13a3	-1.51337	6.83897e-08	I
ENSMUSG00000057280	Musk	0.84163	0.00491579	I
ENSMUSG00000007613	Tgfbr1	3.30562	3.11227e-18	I
ENSMUSG00000025432	Avil	0.939448	2.7146e-06	I
ENSMUSG00000031596	Slc7a2	-0.733792	0.000161082	I
ENSMUSG00000056493	Foxk1	0.627871	0.00460433	I
ENSMUSG00000049323	Smcr8	0.635839	0.00325577	I
ENSMUSG00000037613	Tnfrsf23	0.717737	0.000900857	I
ENSMUSG00000020937	Plcd3	-1.69963	1.25603e-09	I
ENSMUSG00000097624	Gm5091	0.760758	0.00976284	I
ENSMUSG00000067279	Ppp1r3c	0.594561	0.00615193	I
ENSMUSG00000020407	Upp1	1.47988	1.44812e-10	I
ENSMUSG00000048489	8430408G22Rik	-0.684711	0.00313519	I
ENSMUSG00000029205	Chrna9	-1.04798	5.08206e-05	I
ENSMUSG00000008035	Mid1ip1	1.6657	4.90395e-18	I
ENSMUSG00000032802	Srxn1	0.760928	0.000295941	I
ENSMUSG00000037035	Inhbb	-0.820832	0.000814547	I
ENSMUSG00000004791	Pgf	-3.08411	1.24089e-22	I
ENSMUSG00000045349	Sh2d5	0.634	0.00266298	I
ENSMUSG00000057137	Tmem140	-0.713379	0.00487007	I
ENSMUSG00000024529	Lox	-1.0424	9.92035e-07	I
ENSMUSG00000019577	Pdk4	-1.5689	1.03373e-11	I
ENSMUSG00000048546	Tob2	0.621066	0.00313519	I
ENSMUSG00000020893	Per1	-1.31031	7.66674e-10	I
ENSMUSG00000045092	S1pr1	-0.612178	0.00257802	I
ENSMUSG00000030022	Adamts9	0.804445	6.83114e-05	I
ENSMUSG00000033538	Casp4	-1.15428	0.000413022	I
ENSMUSG00000046223	Plaur	0.6404	0.00275712	I
ENSMUSG00000052560	Cpne8	0.6205	0.00375314	I
ENSMUSG00000071713	Csf2rb	0.66169	0.00653845	I
ENSMUSG00000071714	Csf2rb2	0.634544	0.00658243	I
ENSMUSG00000004040	Stat3	-2.2138	1.61511e-23	I
ENSMUSG00000070424	Art5	-1.05904	0.00639637	I
ENSMUSG00000003541	Ier3	2.04639	8.39195e-26	I
ENSMUSG00000051316	Taf7	0.764837	0.00357655	I
ENSMUSG00000034684	Sema3f	-0.688042	0.000551872	I
ENSMUSG00000021814	Anxa7	1.40315	8.32678e-09	I
ENSMUSG00000038400	Pmepa1	0.732771	0.00105605	I
ENSMUSG00000038811	Gngt2	-0.816538	0.00118943	I
ENSMUSG00000037465	Klf10	0.923912	0.000877362	I
ENSMUSG00000044258	Ctla2a	0.643012	0.00256403	I
ENSMUSG00000030967	Zranb1	-0.93865	0.000116244	I
ENSMUSG00000048572	Tmem252	-0.622383	0.00314092	I
ENSMUSG00000039706	Ldb2	-0.69914	0.00140335	I
ENSMUSG00000006403	Adamts4	-1.66131	5.66021e-19	I
ENSMUSG00000030748	Il4ra	1.1649	0.000104234	I
ENSMUSG00000073599	Ecscr	0.605297	0.00685539	I
ENSMUSG00000025492	Ifitm3	0.931362	3.06015e-06	I
ENSMUSG00000028041	Adam15	0.842025	2.34041e-05	I
ENSMUSG00000022500	Litaf	1.0512	6.04238e-08	I
ENSMUSG00000078515	Ddi2	-0.74476	0.00746559	I
ENSMUSG00000075602	Ly6a	-1.04913	0.00737266	I
ENSMUSG00000037095	Lrg1	-1.35769	0.000820131	I
ENSMUSG00000036856	Wnt4	0.723079	0.000746887	I
ENSMUSG00000056749	Nfil3	-0.760364	0.00477862	I
ENSMUSG00000027368	Dusp2	0.895854	1.80484e-05	I
ENSMUSG00000021903	Galnt15	-1.4485	1.0263e-08	I
ENSMUSG00000058624	Gda	-0.999074	0.00519588	I
ENSMUSG00000048120	Entpd1	0.68893	0.00305306	I
ENSMUSG00000058396	Gpr182	1.31032	0.00509318	I
ENSMUSG00000021418	Rpp40	-1.81409	3.92699e-09	I
ENSMUSG00000030699	Tbx6	-1.26323	0.000100691	I
ENSMUSG00000040265	Dnm3	-0.888421	0.00151435	I
ENSMUSG00000024597	Slc12a2	1.30623	1.04227e-06	I
ENSMUSG00000036745	Ttll7	0.740935	0.000730852	I
ENSMUSG00000084940	Gm15935	0.62521	0.00795635	I
ENSMUSG00000026107	Nabp1	-1.85179	5.62845e-06	I
ENSMUSG00000034472	Rasd2	-0.889863	0.000528553	I
ENSMUSG00000008658	Rbfox1	2.05194	8.71402e-18	I
ENSMUSG00000035673	Sbno2	0.71828	0.000662399	I
ENSMUSG00000015839	Nfe2l2	-1.36022	4.65922e-14	I
ENSMUSG00000036478	Btg1	-0.784932	0.000728936	I
ENSMUSG00000086938	4930481A15Rik	1.54186	0.00846974	I
ENSMUSG00000026020	Nop58	0.916651	4.26694e-06	I
ENSMUSG00000033249	Hsf4	0.754502	0.000371349	I
ENSMUSG00000022018	Rgcc	-1.17232	2.02777e-08	I
ENSMUSG00000031838	Ifi30	0.892915	0.000185143	I
ENSMUSG00000047407	Tgif1	-0.602662	0.00292461	I
ENSMUSG00000029482	Aacs	0.891825	5.43746e-05	I
ENSMUSG00000050708	Ftl1	-0.665487	0.00355174	I
ENSMUSG00000037017	Zscan21	-1.56596	0.000756615	I
ENSMUSG00000001739	Cldn15	2.49743	9.88789e-33	I
ENSMUSG00000030161	Gabarapl1	-0.806721	7.47496e-05	I
ENSMUSG00000022346	Myc	-1.02669	4.94478e-08	I
ENSMUSG00000020108	Ddit4	1.22734	7.96954e-11	I
ENSMUSG00000056737	Capg	0.61246	0.00472542	I
ENSMUSG00000087590	Epb41l4aos	0.655234	0.0089983	I
ENSMUSG00000071637	Cebpd	0.589541	0.00639637	I
ENSMUSG00000086801	Gm15943	0.616582	0.00824715	I
ENSMUSG00000031609	Sap30	-1.00255	0.000161981	I
ENSMUSG00000033739	Fkbpl	1.2532	0.000453007	I
ENSMUSG00000040435	Ppp1r15a	0.744734	0.00153586	I
ENSMUSG00000033685	Ucp2	-1.15962	0.000437615	I
ENSMUSG00000041974	Spidr	0.786186	0.00195667	I
ENSMUSG00000050621	Rps27rt	-1.11344	0.00353683	I
ENSMUSG00000031584	Gsr	-0.787764	0.000159401	I
ENSMUSG00000035530	Eif1	1.98823	0.000647027	I
ENSMUSG00000035399	Oser1	-0.999361	0.000617859	I
ENSMUSG00000022510	Trp63	1.20801	6.23084e-08	I
ENSMUSG00000037621	Atoh8	-1.0774	0.000901197	I
ENSMUSG00000032806	Slc10a3	-1.50164	0.000307386	I
ENSMUSG00000068749	Psma5	-1.05537	0.00626615	I
ENSMUSG00000043091	Tuba1c	-0.694087	0.00229745	I
ENSMUSG00000035923	Myf6	-1.10765	0.000680654	I
ENSMUSG00000069372	Ctxn3	0.586986	0.00626615	I
ENSMUSG00000015837	Sqstm1	-1.36143	2.65919e-14	I
ENSMUSG00000033416	Gucd1	-1.43151	0.000405271	I
ENSMUSG00000030591	Psmd8	0.78867	9.69472e-05	I
ENSMUSG00000005413	Hmox1	2.0849	6.47332e-21	I
ENSMUSG00000019505	Ubb	-2.0614	8.21211e-12	I
ENSMUSG00000028932	Psmc2	-0.873411	3.9821e-05	I
ENSMUSG00000031382	Asb11	0.78721	0.000144867	I
ENSMUSG00000039067	Psmd7	-1.51842	0.00126198	I
ENSMUSG00000039041	Adrm1	-0.647031	0.00121482	I
ENSMUSG00000053332	Gas5	-1.14296	0.00409006	I
ENSMUSG00000036752	Tubb4b	0.748416	0.000734957	I
ENSMUSG00000002055	Spag5	2.1954	3.43045e-31	I
ENSMUSG00000043004	Gng2	-0.634386	0.00229744	I
ENSMUSG00000029416	Slc15a4	0.813403	5.37837e-05	I
ENSMUSG00000025142	Aspscr1	-1.87688	1.53492e-06	I
ENSMUSG00000017221	Psmd3	-1.77463	1.19128e-13	I
ENSMUSG00000002983	Relb	-1.86452	1.05122e-26	I
ENSMUSG00000005625	Psmd4	5.48634	7.17935e-21	I
ENSMUSG00000020799	Tekt1	-1.13435	6.25688e-10	I
ENSMUSG00000027566	Psma7	-1.06872	2.13125e-05	I
ENSMUSG00000086841	2410006H16Rik	1.32206	0.00824715	I
ENSMUSG00000002910	Arrdc2	2.0299	4.41039e-27	I
ENSMUSG00000035828	Pim3	-0.675694	0.00067795	I
ENSMUSG00000079018	Ly6c1	1.18588	0.00748094	I
ENSMUSG00000038264	Sema7a	-0.658308	0.000999652	I
ENSMUSG00000037872	Ackr1	0.71268	0.000927495	I
ENSMUSG00000037820	Tgm2	-0.682937	0.000905947	I
ENSMUSG00000069237	Fam8a1	-0.664079	0.00626615	I
ENSMUSG00000060591	Ifitm2	0.807343	0.00560427	I
ENSMUSG00000010095	Slc3a2	-1.52222	3.36339e-17	I
ENSMUSG00000055538	Zcchc24	1.55326	0.00423943	I
ENSMUSG00000069682	Gm10275	0.64079	0.00627273	I
ENSMUSG00000056537	Rlim	1.10086	0.00467041	I
ENSMUSG00000029086	Prom1	-0.894198	4.71445e-05	I
ENSMUSG00000020806	Rhbdf2	2.29787	6.25688e-10	I
ENSMUSG00000003948	Mmd	-1.99481	7.72617e-24	I
ENSMUSG00000039148	Sart1	0.729662	0.00127051	I
ENSMUSG00000044068	Zrsr1	-0.616548	0.00252505	I
ENSMUSG00000020034	Tcp11l2	3.12297	4.56671e-11	I
ENSMUSG00000072949	Acot1	0.689255	0.00682037	I
ENSMUSG00000026064	Ptp4a1	0.949943	5.22248e-06	I
ENSMUSG00000028333	Anp32b	-1.06604	2.6698e-05	I
ENSMUSG00000035459	Stab2	-1.27634	0.000623869	I
ENSMUSG00000027236	Eif3j1	-1.58025	1.60194e-05	I
ENSMUSG00000036833	Pnpla7	2.54136	0.000741236	I
ENSMUSG00000050335	Lgals3	-0.835422	0.00343638	I
ENSMUSG00000041189	Chrnb1	-0.782434	0.00175759	I
ENSMUSG00000060036	Rpl3	0.698714	0.0056028	I
ENSMUSG00000071072	Ptges3	-0.633231	0.00639637	I
ENSMUSG00000008429	Herpud2	1.70964	8.71402e-18	I
ENSMUSG00000058638	Zfp110	0.587279	0.00519792	I
ENSMUSG00000038007	Acer2	0.740627	0.000944598	I
ENSMUSG00000035299	Mid1	-0.816716	0.000609545	I
ENSMUSG00000021226	Acot2	3.89578	2.77545e-09	I
ENSMUSG00000042129	Rassf4	0.667065	0.00195699	I
ENSMUSG00000024750	Zfand5	-1.53896	1.45643e-06	I
ENSMUSG00000040128	Pnrc1	1.07395	0.0014622	I
ENSMUSG00000038520	Tbc1d17	-1.34222	0.00107922	I
ENSMUSG00000027397	Slc20a1	-0.860281	1.90043e-05	I
ENSMUSG00000021595	Nsun2	1.3583	5.0604e-09	I
ENSMUSG00000028150	Rorc	0.836901	2.64505e-05	I
ENSMUSG00000002625	Akap8l	-2.04161	4.79575e-29	I
ENSMUSG00000056501	Cebpb	1.60259	0.00464358	I
ENSMUSG00000074063	Osgin1	0.620388	0.00691773	I
ENSMUSG00000039634	Zfp189	0.752194	0.00132961	I
ENSMUSG00000031636	Pdlim3	0.804003	0.000161981	I
ENSMUSG00000028961	Pgd	1.02774	4.39112e-05	I
ENSMUSG00000029381	Shroom3	1.06965	5.322e-05	I
ENSMUSG00000003051	Elf3	-2.04568	3.65779e-26	I
ENSMUSG00000042628	Zfyve1	-0.671634	0.00208363	I
ENSMUSG00000031109	Enox2	0.7718	0.000124868	I
ENSMUSG00000022490	Ppp1r1a	1.20344	5.94677e-08	I
ENSMUSG00000008348	Ubc	-2.18385	7.83785e-18	I
ENSMUSG00000090733	Rps27	0.595153	0.00930522	I
ENSMUSG00000022357	Klhl38	1.04117	5.24185e-08	I
ENSMUSG00000029321	Slc10a6	0.827351	5.12366e-05	I
ENSMUSG00000031431	Tsc22d3	-0.768785	0.00015166	I
ENSMUSG00000027075	Slc43a1	-0.835072	1.36985e-05	I
ENSMUSG00000005936	Kctd20	1.78702	2.62646e-20	I
ENSMUSG00000038866	Zcchc2	0.762975	0.00119465	I
ENSMUSG00000026475	Rgs16	0.970648	7.98835e-06	II
ENSMUSG00000030579	Tyrobp	0.811882	9.64666e-05	II
ENSMUSG00000033220	Rac2	0.743111	0.000363521	II
ENSMUSG00000054855	Rnd1	0.641923	0.00411775	II
ENSMUSG00000027398	Il1b	1.45569	1.90043e-05	II
ENSMUSG00000017737	Mmp9	1.66755	3.522e-13	II
ENSMUSG00000032484	Ngp	1.70595	0.000260852	II
ENSMUSG00000032496	Ltf	-0.767302	0.000261498	II
ENSMUSG00000021998	Lcp1	1.11993	1.961e-08	II
ENSMUSG00000028859	Csf3r	-0.805566	3.77307e-05	II
ENSMUSG00000038624	Nepn	-0.644692	0.0011583	II
ENSMUSG00000053626	Tll1	0.659012	0.00409063	II
ENSMUSG00000025270	Alas2	-0.968273	2.00924e-06	II
ENSMUSG00000032372	Plscr2	0.789315	0.000254242	II
ENSMUSG00000056071	S100a9	-0.602325	0.00453827	II
ENSMUSG00000056054	S100a8	0.617452	0.00446755	II
ENSMUSG00000030707	Coro1a	-1.06622	0.000102353	II
ENSMUSG00000026480	Ncf2	1.24906	8.10354e-06	II
ENSMUSG00000058818	Pirb	-1.42399	0.00533881	II
ENSMUSG00000025491	Ifitm1	-1.04739	3.03653e-06	II
ENSMUSG00000022651	Retnlg	1.27968	7.30709e-08	II
ENSMUSG00000069792	Wfdc17	0.702823	0.0063232	II
ENSMUSG00000048163	Selplg	-0.617136	0.00307716	II
ENSMUSG00000027360	Hdc	-0.993705	1.7993e-05	II
ENSMUSG00000062593	Lilrb4a	0.676119	0.00583021	II
ENSMUSG00000026580	Selp	0.873771	9.57289e-06	II
ENSMUSG00000023367	Tmem176a	-1.41897	3.51312e-07	II
ENSMUSG00000009687	Fxyd5	-1.81668	1.4252e-17	II
ENSMUSG00000001227	Sema6b	2.72994	2.46091e-37	II
ENSMUSG00000026822	Lcn2	-1.51175	1.05371e-05	II
ENSMUSG00000035711	Dok3	0.722447	0.000671872	II
ENSMUSG00000005800	Mmp8	1.83053	1.59197e-20	II
ENSMUSG00000022146	Osmr	1.1057	3.12281e-08	II
ENSMUSG00000009585	Apobec3	1.98748	1.29969e-17	II
ENSMUSG00000085411	Gm14319	0.595245	0.00797051	II
ENSMUSG00000022074	Tnfrsf10b	1.41313	2.17474e-08	II
ENSMUSG00000034845	Plvap	-0.849259	0.000582335	II
ENSMUSG00000026110	Mgat4a	0.9451	5.62845e-06	II
ENSMUSG00000028599	Tnfrsf1b	-1.9405	3.28311e-05	II
ENSMUSG00000031803	B3gnt3	1.08256	0.000180247	II
ENSMUSG00000039529	Atp8b1	0.669554	0.00132961	II
ENSMUSG00000032548	Slco2a1	-0.866644	0.000265617	II
ENSMUSG00000015143	Actn1	2.32027	3.31429e-15	II
ENSMUSG00000016756	Cmah	-1.3221	1.00733e-13	II
ENSMUSG00000028381	Ugcg	-1.92456	2.95439e-05	II
ENSMUSG00000024691	Fam111a	1.44573	1.44535e-06	II
ENSMUSG00000029135	Fosl2	-0.917102	4.99407e-05	II
ENSMUSG00000031805	Jak3	1.0413	0.000180338	II
ENSMUSG00000058099	Nfam1	-0.645064	0.00505384	II
ENSMUSG00000037936	Scarb1	0.807733	0.000927495	II
ENSMUSG00000000204	Slfn4	4.68557	1.14591e-79	II
ENSMUSG00000026180	Cxcr2	-1.87619	5.84246e-06	II
ENSMUSG00000026395	Ptprc	-1.4234	6.72913e-06	II
ENSMUSG00000030786	Itgam	-1.40383	0.000109999	II
ENSMUSG00000073418	C4b	0.597738	0.0068551	II
ENSMUSG00000026459	Myog	-0.859561	7.69825e-06	II
ENSMUSG00000052305	Hbb-bs	-1.27743	0.00367597	II
ENSMUSG00000073940	Hbb-bt	0.626923	0.00691454	II
ENSMUSG00000024014	Pim1	1.07223	5.55486e-07	II
ENSMUSG00000027313	Chac1	0.855494	1.67867e-05	II
ENSMUSG00000032883	Acsl3	2.30646	0.000312862	II
ENSMUSG00000055148	Klf2	-0.775185	0.00421217	II
ENSMUSG00000090698	Apold1	-0.593656	0.00923187	II
ENSMUSG00000021453	Gadd45g	1.44938	4.28084e-09	II
ENSMUSG00000041378	Cldn5	0.698504	0.00176749	II
ENSMUSG00000028195	Cyr61	0.844018	2.64505e-05	II
ENSMUSG00000052837	Junb	-1.15525	0.00376202	II
ENSMUSG00000044320	1700001O22Rik	-0.797418	0.00257481	II
ENSMUSG00000051726	Kcnf1	-0.592525	0.0035838	II
ENSMUSG00000054863	Fam19a5	0.709984	0.00415171	II
ENSMUSG00000069763	Tmem100	-0.994529	0.0062825	II
ENSMUSG00000029659	Medag	-0.94787	6.08096e-05	II
ENSMUSG00000020737	Jpt1	4.51718	4.99175e-10	II
ENSMUSG00000021957	Tkt	-1.32301	1.72854e-08	II
ENSMUSG00000022220	Adcy4	-1.35794	3.36875e-08	II
ENSMUSG00000053175	Bcl3	0.62771	0.00405183	II
ENSMUSG00000053113	Socs3	1.45425	0.00400703	II
ENSMUSG00000068392	Rnase13	-0.948305	0.00621103	II
ENSMUSG00000042659	Arrdc4	-1.2299	0.00208659	II
ENSMUSG00000025902	Sox17	-1.06693	4.21867e-06	II
ENSMUSG00000028525	Pde4b	2.11824	3.11384e-05	II
ENSMUSG00000033083	Tbc1d4	-1.60271	0.000339999	II
ENSMUSG00000018339	Gpx3	-1.81628	1.17459e-12	II
ENSMUSG00000005718	Tfap4	6.37652	1.16259e-20	II
ENSMUSG00000087259	2610035D17Rik	0.603428	0.00870244	II
ENSMUSG00000019590	Cyb561	-1.3878	1.16565e-11	II
ENSMUSG00000036256	Igfbp7	1.98628	0.000699869	II
ENSMUSG00000072620	Slfn2	-0.902557	0.00665727	II
ENSMUSG00000024349	Tmem173	-1.08016	8.23824e-07	II
ENSMUSG00000050105	Grrp1	0.717248	0.00337976	II
ENSMUSG00000000682	Cd52	3.10277	4.59662e-46	II
ENSMUSG00000038296	Galnt18	0.803261	0.000999786	II
ENSMUSG00000047798	Cd300lf	-0.629678	0.00303722	II
ENSMUSG00000046818	Ddit4l	0.624823	0.00284554	II
ENSMUSG00000034040	Wbscr17	-0.99143	0.000468124	II
ENSMUSG00000086866	4930512H18Rik	-1.0283	0.00832203	II
ENSMUSG00000074634	Tmem267	-0.802915	0.0072923	II
ENSMUSG00000026773	Pfkfb3	-1.66539	1.02359e-05	II
ENSMUSG00000057719	Sh3rf2	0.61856	0.00499961	II
ENSMUSG00000025172	Ankrd2	-1.498	1.98463e-06	III
ENSMUSG00000030470	Csrp3	0.793258	9.12745e-05	III
ENSMUSG00000028885	Smpdl3b	-1.58585	3.93011e-05	III
ENSMUSG00000037139	Myom3	0.827587	0.000832271	III
ENSMUSG00000033196	Myh2	-1.45695	0.000356805	III
ENSMUSG00000059741	Myl3	-0.617442	0.00544433	III
ENSMUSG00000028116	Myoz2	0.899983	2.62607e-05	III
ENSMUSG00000053093	Myh7	-0.638792	0.00391513	III
ENSMUSG00000022899	Slc15a2	-1.0227	1.36079e-07	III
ENSMUSG00000019850	Tnfaip3	-1.20691	1.59196e-11	III
ENSMUSG00000031910	Has3	1.10201	0.000198933	III
ENSMUSG00000070348	Ccnd1	-1.05852	0.00636576	III
ENSMUSG00000054580	Pla2r1	-1.00773	0.00411302	III
ENSMUSG00000081194	Gm8424	0.650741	0.00777685	III
ENSMUSG00000033871	Ppargc1b	0.735005	0.000458285	III
ENSMUSG00000042292	Mkl1	-0.955549	0.00200547	III
ENSMUSG00000020661	Dnmt3a	1.2294	3.41431e-10	III
ENSMUSG00000058056	Palld	-0.705587	0.00499989	III
ENSMUSG00000020961	Ston2	-2.28157	1.38788e-09	III
ENSMUSG00000052920	Prkg1	0.629359	0.00376424	III
ENSMUSG00000066647	Gm5113	-1.27119	0.0061159	III
ENSMUSG00000086245	Gm16170	0.612221	0.00818924	III
ENSMUSG00000056880	Gadl1	-0.746623	0.00479596	III
ENSMUSG00000087413	Gm11266	-1.01326	0.00892807	III
ENSMUSG00000097316	Gm10516	-0.786195	0.00952605	III
ENSMUSG00000033849	B3galt2	-0.847643	0.000454081	III
ENSMUSG00000021265	Slc25a29	-1.30386	3.19874e-09	III
ENSMUSG00000025777	Gdap1	0.979784	3.20012e-06	III
ENSMUSG00000039936	Pik3cd	0.779929	0.00141238	III
ENSMUSG00000033705	Stard9	0.799586	0.000447947	III
ENSMUSG00000041633	Kctd12b	0.792167	0.00186984	III
ENSMUSG00000079465	Col4a3	0.677021	0.00776255	III
ENSMUSG00000038119	Cdon	-1.66606	0.000948802	III
ENSMUSG00000047146	Tet1	0.846696	0.00289802	III
ENSMUSG00000004891	Nes	-2.01045	5.0494e-22	III
ENSMUSG00000016327	Atp1b4	1.40334	6.3843e-14	III
ENSMUSG00000054477	Kcnn2	-0.894001	0.00409643	III
ENSMUSG00000028763	Hspg2	-0.911633	3.29584e-05	III
ENSMUSG00000023328	Ache	-1.20838	3.28767e-07	III
ENSMUSG00000034714	Ttyh2	0.751053	0.000579713	III
ENSMUSG00000020674	Pxdn	1.67487	3.48585e-10	III
ENSMUSG00000050503	Fbxl22	-0.734041	0.00343638	III
ENSMUSG00000042842	Serpinb6b	1.74022	0.00217535	III
ENSMUSG00000012819	Cdh23	-1.54063	4.42434e-16	III
ENSMUSG00000025092	Hspa12a	-0.971776	1.52344e-06	III
ENSMUSG00000028339	Col15a1	-1.01078	2.6732e-05	III
ENSMUSG00000027955	Fam198b	-0.825698	2.29364e-05	III
ENSMUSG00000039384	Dusp10	-0.932408	0.00132961	III
ENSMUSG00000079022	Col22a1	0.594265	0.00763389	III
ENSMUSG00000035513	Ntng2	-0.699956	0.000636051	III
ENSMUSG00000032014	Oaf	-0.833126	0.000227185	III
ENSMUSG00000047604	Frat2	-0.617936	0.00300096	III
ENSMUSG00000020150	Gamt	-1.51707	1.04585e-10	III
ENSMUSG00000031385	Plxnb3	0.905208	0.000147499	III
ENSMUSG00000041460	Cacna2d4	1.3714	0.00181217	III
ENSMUSG00000035967	Ints6l	-0.719199	0.000680654	III
ENSMUSG00000020431	Adcy1	-1.33248	1.47157e-10	III
ENSMUSG00000026147	Col9a1	-1.08346	5.7379e-06	III
ENSMUSG00000064225	Paqr9	-0.749319	0.00610981	III
ENSMUSG00000020623	Map2k6	1.61341	3.09713e-10	III
ENSMUSG00000027832	Ptx3	0.866306	2.21245e-05	III
ENSMUSG00000032177	Pde4a	0.749652	0.000232852	III
ENSMUSG00000036306	Lzts1	-1.21302	0.000706417	III
ENSMUSG00000038375	Trp53inp2	-0.842032	0.00105605	III
ENSMUSG00000022594	Lynx1	1.13171	7.26618e-08	III
ENSMUSG00000000168	Dlat	5.79588	1.82602e-84	III
ENSMUSG00000025795	Rassf3	0.915731	4.16692e-06	III
ENSMUSG00000038582	Pptc7	0.687029	0.00115762	III
ENSMUSG00000048897	Zfp710	-0.787814	0.00323427	III
ENSMUSG00000031216	Stard8	-1.38141	0.000125093	III
ENSMUSG00000022186	Oxct1	-1.82243	3.33156e-08	III
ENSMUSG00000032536	Trak1	-0.790707	0.000263019	III
ENSMUSG00000058454	Dhcr7	-1.26843	0.00519588	III
ENSMUSG00000042155	Klhl23	-1.33742	0.00196848	III
ENSMUSG00000030309	Caprin2	0.815211	8.09736e-05	III
ENSMUSG00000025271	Pfkfb1	1.17808	2.0619e-06	III
ENSMUSG00000030323	Ift122	0.879473	8.63246e-05	III
ENSMUSG00000046345	Smco1	-0.918384	0.00279858	III
ENSMUSG00000040990	Sh3kbp1	-1.0262	0.00169891	III
ENSMUSG00000034164	Emid1	-1.39055	0.000511751	III
ENSMUSG00000066842	Hmcn1	-0.862836	0.00613226	III
ENSMUSG00000042834	Nrep	0.644162	0.0021609	III
ENSMUSG00000025150	Cbr2	-2.14983	1.58501e-06	III
ENSMUSG00000039007	Cpq	-1.16353	0.00121256	III
ENSMUSG00000031239	Itm2a	-1.72714	0.000126306	III
ENSMUSG00000049038	Mterf2	-1.15949	0.00325577	III
ENSMUSG00000034926	Dhcr24	1.43785	0.000582335	III
ENSMUSG00000030433	Sbk2	-1.09811	8.97351e-05	III
ENSMUSG00000044086	Lmod3	-1.09683	0.0025353	III
ENSMUSG00000056043	Rgs9bp	-0.911139	0.0044437	III
ENSMUSG00000054752	Fsd1l	-0.671531	0.00411775	III
ENSMUSG00000041757	Plekha6	-0.927911	0.00189755	III
ENSMUSG00000078486	Perm1	-0.729	0.00746054	III
ENSMUSG00000038201	Kcna7	1.23224	0.000971861	III
ENSMUSG00000027333	Smox	-1.06833	1.79204e-05	III
ENSMUSG00000031924	Cyb5b	-1.03854	0.000202551	III
ENSMUSG00000031133	Arhgef6	-0.960271	0.000124925	III
ENSMUSG00000055003	Lrtm2	-0.609287	0.00417984	III
ENSMUSG00000097666	A330094K24Rik	-1.17212	0.00978107	III
ENSMUSG00000023249	Parp3	2.12895	2.93264e-07	III
ENSMUSG00000029122	Evc	-1.26319	4.99407e-05	III
ENSMUSG00000060961	Slc4a4	-0.995537	0.00561101	III
ENSMUSG00000038302	Afg1l	0.738065	0.0010077	III
ENSMUSG00000052276	Ostn	-0.624984	0.0036426	III
ENSMUSG00000097368	Gm10390	-1.33404	0.00966525	III
ENSMUSG00000021281	Tnfaip2	1.13664	3.45143e-09	III
ENSMUSG00000061353	Cxcl12	-1.29903	0.00563569	III
ENSMUSG00000041920	Slc16a6	-0.628181	0.00194955	III
ENSMUSG00000045246	Kcng4	-0.635552	0.00262237	III
ENSMUSG00000027004	Frzb	-0.90908	1.25907e-05	III
ENSMUSG00000038777	Sema6c	-1.07071	0.00118323	III
ENSMUSG00000013236	Ptprs	2.76366	5.46095e-16	III
ENSMUSG00000050315	Synpo2	0.871076	0.0034326	III
ENSMUSG00000023019	Gpd1	-1.99771	1.8311e-07	III
ENSMUSG00000027887	Sypl2	0.921511	2.26593e-05	III
ENSMUSG00000024411	Aqp4	0.964008	8.70982e-07	III
ENSMUSG00000027253	Lrp4	-0.986443	1.67065e-05	III
ENSMUSG00000031790	Mmp15	-0.776576	0.000179939	III
ENSMUSG00000030098	Grip2	0.885984	7.19463e-05	III
ENSMUSG00000054978	Kbtbd13	-0.715345	0.00417712	III
ENSMUSG00000032192	Gnb5	0.814659	0.000239096	III
ENSMUSG00000023951	Vegfa	1.02089	5.31721e-07	III
ENSMUSG00000021994	Wnt5a	1.23846	1.73301e-08	III
ENSMUSG00000040694	Apobec2	1.1008	0.00163284	III
ENSMUSG00000026389	Steap3	1.41284	6.59517e-06	III
ENSMUSG00000063229	Ldha	-0.616681	0.00593727	III
ENSMUSG00000087523	Gm12319	-0.650202	0.00896103	III
ENSMUSG00000061816	Myl1	0.958586	0.0056486	III
ENSMUSG00000022551	Cyc1	1.37339	7.1317e-08	III
ENSMUSG00000014606	Slc25a11	1.80955	1.35086e-15	III
ENSMUSG00000020475	Pgam2	1.30841	2.46728e-10	III
ENSMUSG00000031840	Rab3a	-0.924054	0.000187623	III
ENSMUSG00000074218	Cox7a1	0.608723	0.00711208	III
ENSMUSG00000023336	Wfdc1	-1.43851	3.32494e-07	III
ENSMUSG00000050043	Tmx2	0.74702	0.00335992	III
ENSMUSG00000018893	Mb	-1.3704	2.73701e-12	III
ENSMUSG00000021622	Ckmt2	-1.34578	5.11936e-09	III
ENSMUSG00000022803	Popdc2	-1.15057	1.2715e-07	III
ENSMUSG00000019863	Qrsl1	-1.56272	1.80889e-11	III
ENSMUSG00000039765	Cc2d2a	-0.690156	0.00140442	III
ENSMUSG00000021906	Oxnad1	#NAME?	1.66796e-08	III
ENSMUSG00000032279	Idh3a	-0.768207	0.000243774	III
ENSMUSG00000024955	Esrra	3.93046	1.4947e-06	III
ENSMUSG00000060600	Eno3	-0.886649	0.00560894	III
ENSMUSG00000023456	Tpi1	1.11017	3.57262e-07	III
ENSMUSG00000047343	Mettl21c	-0.61106	0.00292461	III
ENSMUSG00000031312	Itgb1bp2	1.78421	0.000127957	III
ENSMUSG00000026888	Grb14	1.04299	1.24894e-05	III
ENSMUSG00000030089	Slc41a3	0.846926	7.14041e-05	III
ENSMUSG00000008318	Relt	1.71538	7.19198e-18	III
ENSMUSG00000042978	Sbk1	-0.673493	0.00223358	III
ENSMUSG00000035275	Raver2	0.754202	0.00059312	III
ENSMUSG00000028944	Prkag2	0.991973	4.28705e-05	III
ENSMUSG00000025425	St8sia5	-0.901702	2.65216e-06	III
ENSMUSG00000070803	Cited4	-0.880953	0.00639637	III
ENSMUSG00000030317	Timp4	1.8813	8.41729e-05	IV
ENSMUSG00000061780	Cfd	-0.79263	0.0056486	IV
ENSMUSG00000041798	Gck	-0.636196	0.00194905	IV
ENSMUSG00000042254	Cilp	-0.813591	0.00200471	IV
ENSMUSG00000046828	Mettl21e	-0.674909	0.00289762	IV
ENSMUSG00000084929	Foxo6os	-0.734391	0.00795635	IV
ENSMUSG00000089703	Gm15833	0.68657	0.00913046	IV
ENSMUSG00000028341	Nr4a3	-1.03272	2.78082e-05	IV
ENSMUSG00000031712	Il15	0.77693	0.000168828	IV
ENSMUSG00000024033	Rsph1	0.975944	5.75697e-07	IV
ENSMUSG00000043099	Hic1	-1.57547	0.00231233	IV
ENSMUSG00000007888	Crlf1	3.43005	4.42011e-18	IV
ENSMUSG00000015312	Gadd45b	1.67362	1.00556e-14	IV
ENSMUSG00000030930	Chst15	0.82627	0.000114581	IV
ENSMUSG00000039157	Fam102a	-0.654669	0.00129514	IV
ENSMUSG00000038530	Rgs4	0.675153	0.00110448	IV
ENSMUSG00000046916	Myct1	-0.686052	0.00289802	IV
ENSMUSG00000038418	Egr1	-1.14132	0.00107918	IV
ENSMUSG00000076617	Ighm	-0.659313	0.00744938	IV
ENSMUSG00000037705	Tecta	0.710146	0.000901197	IV
ENSMUSG00000027408	Cpxm1	0.867664	1.94565e-05	IV
ENSMUSG00000072235	Tuba1a	-0.970679	0.00665727	IV
ENSMUSG00000025610	Map3k7cl	1.38973	3.07349e-06	IV
ENSMUSG00000072941	Sod3	0.617004	0.00682037	IV
ENSMUSG00000056917	Sipa1	-1.23316	0.00484333	IV
ENSMUSG00000027716	Trpc3	0.851529	2.16979e-05	IV
ENSMUSG00000023034	Nr4a1	-1.09791	1.98139e-07	IV
ENSMUSG00000024168	Tmem204	5.71564	7.58977e-07	IV
ENSMUSG00000037999	Arap2	-0.97292	0.000927691	IV
ENSMUSG00000038146	Notch3	0.78266	0.000954256	IV
ENSMUSG00000027624	Epb41l1	-0.833208	2.15567e-05	IV
ENSMUSG00000022687	Boc	-1.09594	9.29846e-08	IV
ENSMUSG00000050666	Vstm4	-1.32422	0.00355083	IV
ENSMUSG00000032860	P2ry2	-1.3046	0.000310549	IV
ENSMUSG00000032911	Cspg4	-0.707338	0.000313158	IV
ENSMUSG00000028369	Svep1	1.03619	2.83323e-05	IV
ENSMUSG00000033960	Jcad	-0.749888	0.000465038	IV
ENSMUSG00000030516	Tjp1	0.843381	9.33247e-05	IV
ENSMUSG00000055639	Dach1	-0.612112	0.00442593	IV
ENSMUSG00000006014	Prg4	1.89169	3.86941e-20	IV
ENSMUSG00000022994	Adcy6	-1.40513	1.66148e-07	IV
ENSMUSG00000026483	Fam129a	-1.48367	8.30765e-06	IV
ENSMUSG00000021390	Ogn	-1.55127	3.91758e-09	IV
ENSMUSG00000005397	Nid1	-1.99841	5.58933e-21	IV
ENSMUSG00000032946	Rasgrp2	0.763234	0.000328389	IV
ENSMUSG00000038521	C1s1	0.766259	0.00108004	IV
ENSMUSG00000020589	Fam49a	1.61708	2.53392e-10	IV
ENSMUSG00000040249	Lrp1	0.679265	0.00151417	IV
ENSMUSG00000017417	Plxdc1	-1.3634	2.09832e-13	IV
ENSMUSG00000021806	Nid2	-1.06355	7.92879e-09	IV
ENSMUSG00000084843	B230312C02Rik	-0.999519	0.00789367	IV
ENSMUSG00000021223	Papln	-1.13499	2.63022e-09	IV
ENSMUSG00000027375	Mal	-2.59756	1.81022e-05	IV
ENSMUSG00000047485	Klhl34	0.658933	0.00296339	IV
ENSMUSG00000039316	Rftn1	0.803856	0.00132219	IV
ENSMUSG00000033715	Akr1c14	-0.778959	0.000450352	IV
ENSMUSG00000043943	Naalad2	0.729973	0.00249107	IV
ENSMUSG00000068614	Actc1	-0.672965	0.00621103	IV
ENSMUSG00000002900	Lamb1	7.74486	1.52058e-27	IV
ENSMUSG00000048776	Pthlh	-0.73461	0.00321023	IV
ENSMUSG00000097451	Rian	-0.616661	0.00967912	IV
ENSMUSG00000021268	Meg3	1.12353	3.2783e-09	IV
ENSMUSG00000031659	Adcy7	1.04583	0.000163268	IV
ENSMUSG00000021057	Akap5	-1.20727	1.46641e-09	IV
ENSMUSG00000029417	Cxcl9	-0.854405	5.43562e-05	IV
ENSMUSG00000027820	Mme	0.899587	2.18869e-05	IV
ENSMUSG00000033585	Ndn	-0.708577	0.000437033	IV
ENSMUSG00000086040	Wipf3	0.58611	0.00817055	IV
ENSMUSG00000000223	Drp2	6.40689	1.90917e-77	IV
ENSMUSG00000068036	Afdn	0.613733	0.00618136	IV
ENSMUSG00000090222	Ifi203-ps	2.28871	0.00913046	IV
ENSMUSG00000022894	Adamts5	1.18389	1.35821e-07	IV
ENSMUSG00000071984	Fndc1	1.26126	0.00663543	IV
ENSMUSG00000026825	Dnm1	-2.03013	1.11655e-05	IV
ENSMUSG00000041828	Abca8a	-1.10306	0.00194955	IV
ENSMUSG00000055632	Hmcn2	-0.654831	0.00427345	IV
ENSMUSG00000033544	Angptl1	0.749601	0.000413022	IV
ENSMUSG00000094686	Ccl21a	-0.712523	0.00940262	IV
ENSMUSG00000032179	Bmp5	2.59389	0.000234424	IV
ENSMUSG00000029185	Fam114a1	0.81772	4.99407e-05	IV
ENSMUSG00000043496	Tril	0.717419	0.0024188	IV
ENSMUSG00000056328	Myh1	0.610626	0.00454223	IV
ENSMUSG00000020900	Myh10	1.2069	8.0744e-10	IV
ENSMUSG00000011256	Adam19	-1.80163	1.24111e-16	IV
ENSMUSG00000047497	Adamts12	-0.627879	0.00298108	IV
ENSMUSG00000052374	Actn2	-0.817115	0.00370871	IV
ENSMUSG00000030889	Vwa3a	-0.850871	0.000114581	IV
ENSMUSG00000004098	Col5a3	-1.74139	4.17228e-23	IV
ENSMUSG00000023868	Pde10a	1.00012	4.48912e-07	IV
ENSMUSG00000040280	Ndufa4l2	0.670701	0.00152217	IV
ENSMUSG00000021388	Aspn	1.16596	3.45143e-09	IV
ENSMUSG00000026678	Rgs5	2.62181	9.68535e-06	IV
ENSMUSG00000024620	Pdgfrb	-1.05577	1.33407e-06	IV
ENSMUSG00000023885	Thbs2	-0.970711	4.72704e-07	IV
ENSMUSG00000028989	Angptl7	-1.10783	4.64412e-05	IV
ENSMUSG00000006800	Sulf2	2.72331	6.50067e-19	IV
ENSMUSG00000026748	Plxdc2	1.97375	1.01125e-05	IV
ENSMUSG00000022032	Scara5	-1.77351	2.06016e-08	IV
ENSMUSG00000041734	Kirrel	-1.06085	0.00189755	IV
ENSMUSG00000040797	Iqsec3	-1.11845	0.00163763	IV
ENSMUSG00000036186	Fam69b	1.14433	0.000688682	IV
ENSMUSG00000001288	Rarg	3.57554	7.90262e-36	IV
ENSMUSG00000036412	Arsi	0.769584	0.000720048	IV
ENSMUSG00000037071	Scd1	0.686794	0.000819477	IV
ENSMUSG00000033022	Cdo1	-0.729452	0.000329117	IV
ENSMUSG00000019278	Dpep1	3.98755	4.39225e-12	IV
ENSMUSG00000034810	Scn7a	-1.70491	0.000582335	IV
ENSMUSG00000024395	Lims2	-1.00734	8.23824e-07	IV
ENSMUSG00000012428	Steap4	1.52659	4.36573e-16	IV
ENSMUSG00000043631	Ecm2	-1.05185	0.0024387	IV
ENSMUSG00000026193	Fn1	0.929307	5.84246e-06	IV
ENSMUSG00000032925	Itgbl1	1.42536	0.000315351	IV
ENSMUSG00000038034	Igsf8	1.12628	0.00094751	IV
ENSMUSG00000056481	Cd248	0.648633	0.00455282	IV
ENSMUSG00000012017	Scarf2	2.57002	1.72307e-16	IV
ENSMUSG00000040428	Plekha4	0.690741	0.00153586	IV
ENSMUSG00000027230	Creb3l1	1.05741	1.57393e-05	IV
ENSMUSG00000030247	Kcnj8	-1.19718	7.80606e-05	IV
ENSMUSG00000000552	Zfp385a	-2.76731	1.62368e-49	IV
ENSMUSG00000038156	Spon1	-1.37139	0.000959737	IV
ENSMUSG00000023191	P3h3	-1.10868	2.64009e-07	IV
ENSMUSG00000048332	Lhfp	-0.7598	0.00313519	IV
ENSMUSG00000010830	Kdelr3	1.58982	1.02257e-16	IV
ENSMUSG00000037206	Islr	0.75297	0.00086206	IV
ENSMUSG00000031342	Gpm6b	-0.785609	0.000128578	IV
ENSMUSG00000030116	Mfap5	-1.30162	7.30045e-05	IV
ENSMUSG00000028364	Tnc	0.868688	2.78255e-05	IV
ENSMUSG00000026879	Gsn	-1.01013	1.22122e-05	IV
ENSMUSG00000019929	Dcn	-1.69308	3.63306e-11	IV
ENSMUSG00000018217	Pmp22	1.38805	1.12972e-12	IV
ENSMUSG00000015085	Entpd2	2.08978	2.23901e-15	IV
ENSMUSG00000040690	Col16a1	-0.692704	0.00162043	IV
ENSMUSG00000021508	Cxcl14	1.14446	4.45645e-09	IV
ENSMUSG00000026697	Myoc	1.1898	1.00478e-05	IV
ENSMUSG00000022512	Cldn1	-1.01904	6.36999e-08	IV
ENSMUSG00000038463	Olfml2b	0.687515	0.00107918	IV
ENSMUSG00000037362	Nov	0.836353	0.00086206	IV
ENSMUSG00000040441	Slc26a10	-0.920915	0.00154885	IV
ENSMUSG00000032744	Heyl	-0.931066	0.00027631	IV
ENSMUSG00000097415	AU020206	-0.653709	0.00966525	IV
ENSMUSG00000026574	Dpt	-0.85951	8.87875e-06	IV
ENSMUSG00000029484	Anxa3	-1.73906	5.58089e-05	IV
ENSMUSG00000020053	Igf1	1.52166	5.00594e-11	IV
ENSMUSG00000074505	Fat3	0.609937	0.00721702	IV
ENSMUSG00000086863	Gm15543	-0.593539	0.00828539	IV
ENSMUSG00000022096	Hr	-1.26445	2.60364e-08	IV
ENSMUSG00000058173	Smco4	0.753753	0.00505384	IV
ENSMUSG00000025384	Faap100	-2.1071	2.56855e-06	IV
ENSMUSG00000027765	P2ry1	0.925761	2.17659e-05	IV
ENSMUSG00000014329	Bicc1	-1.44919	1.34763e-15	IV
ENSMUSG00000038526	Car14	0.743194	0.00110308	IV
ENSMUSG00000085965	2310016D23Rik	1.26056	0.00810878	IV
ENSMUSG00000001270	Ckb	6.27374	4.29095e-36	IV
ENSMUSG00000021130	Galnt16	1.30984	1.59586e-09	IV
ENSMUSG00000038807	Rap1gap2	-0.892887	0.00118323	IV
ENSMUSG00000016496	Cd274	-1.97375	1.00733e-13	IV
ENSMUSG00000062329	Cytl1	-1.44229	0.00571517	IV
ENSMUSG00000042190	Cmklr1	0.679956	0.00197384	IV
ENSMUSG00000019326	Aoc3	1.52685	5.40825e-12	IV
ENSMUSG00000038623	Tm6sf1	-0.651361	0.0011583	IV
ENSMUSG00000032024	Clmp	-0.819919	0.000229631	IV
ENSMUSG00000046598	Bdh1	-0.612231	0.0028016	IV
ENSMUSG00000032285	Dnaja4	-0.890701	0.000251567	IV
ENSMUSG00000010663	Fads1	1.61051	6.12864e-17	IV
ENSMUSG00000030123	Plxnd1	-0.853404	7.41099e-05	IV
ENSMUSG00000071064	Zfp827	-0.75989	0.00639637	IV
ENSMUSG00000062960	Kdr	-0.839857	0.00591044	IV
ENSMUSG00000037408	Cnnm4	-1.15395	0.000870221	IV
ENSMUSG00000045954	Cavin2	-0.629296	0.00274542	IV
ENSMUSG00000043822	Adamtsl5	0.669951	0.0024434	IV
ENSMUSG00000035258	Abi3bp	1.44111	0.000590223	IV
ENSMUSG00000039953	Clstn1	-0.988031	0.00141248	IV
ENSMUSG00000031767	Nudt7	-1.23571	0.000179939	IV
ENSMUSG00000038370	Pcp4l1	-0.668615	0.001051	IV
ENSMUSG00000047819	Tigd4	-0.982476	0.00305306	IV
ENSMUSG00000026235	Epha4	-0.988072	5.90384e-06	IV
ENSMUSG00000029591	Ung	1.01264	5.69821e-05	IV
ENSMUSG00000042589	Cux2	0.671165	0.00203277	IV
ENSMUSG00000058966	Fam57b	0.882883	0.00539568	IV
ENSMUSG00000004748	Mtfp1	1.89902	1.09891e-22	IV
ENSMUSG00000017466	Timp2	6.49674	2.71668e-13	IV
ENSMUSG00000022332	Khdrbs3	1.1756	4.39307e-08	IV
ENSMUSG00000074121	Ntf5	-0.60804	0.00698446	IV
ENSMUSG00000029669	Tspan12	-1.15156	6.16201e-05	IV
ENSMUSG00000027219	Slc28a2	0.961547	1.46495e-05	IV
ENSMUSG00000038764	Ptpn3	0.708698	0.0011674	IV
ENSMUSG00000002032	Tmem25	2.40335	2.81508e-31	IV
ENSMUSG00000021868	Ppif	1.19828	9.70052e-09	IV
ENSMUSG00000025161	Slc16a3	0.959613	1.8303e-06	IV
ENSMUSG00000020744	Slc25a19	-2.58458	5.96614e-10	IV
ENSMUSG00000021591	Glrx	-1.83913	4.73112e-09	IV
ENSMUSG00000025486	Sirt3	1.48082	3.0103e-06	IV
ENSMUSG00000020321	Mdh1	-1.97617	1.32483e-10	IV
ENSMUSG00000018770	Atp5g3	-1.36246	2.393e-12	IV
ENSMUSG00000052135	Foxo6	0.66383	0.0035838	IV
ENSMUSG00000045414	1190002N15Rik	0.634202	0.0026709	IV
ENSMUSG00000031024	St5	0.76707	0.000119475	IV
ENSMUSG00000038319	Kcnh2	-1.10196	0.00102209	IV
ENSMUSG00000034574	Daam1	0.729423	0.000529847	IV
ENSMUSG00000034853	Acot11	-0.81383	0.000582335	IV
ENSMUSG00000029771	Irf5	0.9094	6.50893e-05	IV
ENSMUSG00000058975	Kcnc1	0.633698	0.00543107	IV
ENSMUSG00000010122	Slc47a1	-1.84036	4.10477e-17	IV
ENSMUSG00000025408	Ddit3	-1.19226	2.60138e-06	IV
ENSMUSG00000033453	Adamts15	0.761135	0.000405511	IV
ENSMUSG00000022340	Sybu	-1.25383	4.56373e-08	IV
ENSMUSG00000036854	Hspb6	-1.14513	0.000746515	IV
ENSMUSG00000057604	Lmcd1	-1.28768	0.00499961	IV
ENSMUSG00000048240	Gng7	0.656394	0.00311553	IV
ENSMUSG00000083563	Gm13340	1.00057	0.0077951	IV
ENSMUSG00000028427	Aqp7	0.832626	3.057e-05	IV
ENSMUSG00000017344	Vtn	-1.94609	1.60133e-13	IV
ENSMUSG00000028766	Alpl	0.829087	3.31425e-05	IV
ENSMUSG00000040631	Dok4	-0.649539	0.0015869	IV
ENSMUSG00000035849	Krt222	-1.54605	0.000680654	IV
ENSMUSG00000057329	Bcl2	-1.3965	0.00498464	IV
ENSMUSG00000029521	Chek2	2.79226	5.698e-05	IV
ENSMUSG00000041261	Car8	-0.708423	0.00176176	IV
ENSMUSG00000034570	Inpp5j	0.780248	0.000528553	IV
ENSMUSG00000010064	Slc38a3	1.61364	2.10029e-17	IV
ENSMUSG00000027510	Rbm38	-0.876688	2.085e-05	IV
ENSMUSG00000056569	Mpz	0.672831	0.00472472	IV
ENSMUSG00000021913	Ogdhl	-1.02676	1.68098e-08	IV
ENSMUSG00000038855	Itpkb	-1.29886	0.00119226	IV
ENSMUSG00000025738	Fbxl16	1.89169	3.16808e-06	IV
ENSMUSG00000020846	Rflnb	1.46138	6.95923e-10	IV
ENSMUSG00000057315	Arhgap24	-0.759264	0.00497265	IV
ENSMUSG00000027560	Dok5	-1.19991	2.11901e-05	IV
ENSMUSG00000030352	Tspan9	-1.20764	8.97351e-05	IV
ENSMUSG00000045664	Cdc42ep2	1.96164	0.00269779	IV
ENSMUSG00000018405	Mrm1	1.41037	1.69924e-12	IV
ENSMUSG00000031125	3830403N18Rik	0.809794	0.000124868	IV
ENSMUSG00000050578	Mmp13	-0.928208	0.00346543	IV
ENSMUSG00000029304	Spp1	1.59156	5.09264e-05	IV
ENSMUSG00000017144	Rnd3	1.56769	1.18496e-13	IV
ENSMUSG00000039997	Ifi203	-1.37393	0.00142872	IV
ENSMUSG00000000276	Dgke	-3.08939	1.26235e-63	IV
ENSMUSG00000022324	Matn2	2.60867	4.22567e-08	IV
ENSMUSG00000027848	Olfml3	-0.863569	2.26545e-05	IV
ENSMUSG00000034463	Scara3	-1.25504	0.000527608	IV
ENSMUSG00000022261	Sdc2	1.44133	3.59842e-08	IV
ENSMUSG00000062563	Cys1	-1.23613	0.00577933	IV
ENSMUSG00000031990	Jam3	0.743486	0.000211443	IV
ENSMUSG00000026712	Mrc1	1.00605	1.01125e-05	IV
ENSMUSG00000026784	Pdss1	-1.12482	1.02359e-05	IV
ENSMUSG00000055254	Ntrk2	-0.663535	0.00423943	IV
ENSMUSG00000087366	Junos	-0.729667	0.00879143	IV
ENSMUSG00000034449	Dhrs11	0.719164	0.000514104	IV
ENSMUSG00000046413	Irx3os	-0.604693	0.00279858	IV
ENSMUSG00000014303	Glis2	-1.75363	9.64813e-16	IV
ENSMUSG00000086584	Gm12002	0.601456	0.00824715	IV
ENSMUSG00000036103	Colec12	-0.669669	0.000685593	IV
ENSMUSG00000028047	Thbs3	-1.10026	2.54339e-05	IV
ENSMUSG00000022661	Cd200	1.17014	7.45248e-08	IV
ENSMUSG00000028736	Pax7	-1.11052	3.29584e-05	IV
ENSMUSG00000029309	Sparcl1	-0.813286	5.12366e-05	IV
ENSMUSG00000026674	Ddr2	0.90027	9.64528e-06	IV
ENSMUSG00000001663	Gstt1	-2.54988	6.68353e-33	IV
ENSMUSG00000069662	Marcks	0.860122	0.00626615	IV
ENSMUSG00000029338	Antxr2	-0.780368	5.14221e-05	IV
ENSMUSG00000027199	Gatm	-0.97317	1.40748e-05	IV
ENSMUSG00000022546	Gpt	1.0787	7.1317e-08	IV
ENSMUSG00000022797	Tfrc	-2.13863	1.14078e-07	IV
ENSMUSG00000032786	Alas1	1.19526	0.00027954	IV
ENSMUSG00000020935	Dcakd	-1.86527	1.24122e-09	IV
ENSMUSG00000026576	Atp1b1	0.927277	8.87875e-06	IV
ENSMUSG00000004562	Arhgef40	4.90713	9.42747e-23	IV
ENSMUSG00000040950	Mgl2	-0.902295	0.00166078	IV
ENSMUSG00000055653	Gpc3	-0.590072	0.00443571	IV
ENSMUSG00000029096	Htra3	-0.974016	4.98229e-05	IV
ENSMUSG00000048856	Slc25a47	0.760591	0.00322721	IV
ENSMUSG00000021702	Thbs4	1.63473	5.5209e-09	IV
ENSMUSG00000062542	Syt9	-0.633024	0.00574217	IV
ENSMUSG00000020676	Ccl11	-1.37209	3.65509e-10	IV
ENSMUSG00000028111	Ctsk	0.872307	2.59168e-05	IV
ENSMUSG00000019539	Rcn3	-1.38084	8.31374e-12	IV
ENSMUSG00000000753	Serpinf1	3.40455	2.91406e-41	IV
ENSMUSG00000028600	Podn	-1.64356	3.29584e-05	IV
ENSMUSG00000029661	Col1a2	0.935153	6.12334e-05	IV
ENSMUSG00000001506	Col1a1	-2.44359	7.02311e-35	IV
ENSMUSG00000042804	Gpr153	-0.760636	0.00210072	IV
ENSMUSG00000023886	Smoc2	1.05307	4.72704e-07	IV
ENSMUSG00000022098	Bmp1	2.10461	2.67128e-08	IV
ENSMUSG00000020695	Mrc2	-1.45177	3.82391e-10	IV
ENSMUSG00000024948	Map4k2	0.978876	1.48231e-06	IV
ENSMUSG00000027750	Postn	1.18434	2.16979e-05	IV
ENSMUSG00000000392	Fap	-3.0843	5.82947e-57	IV
ENSMUSG00000033327	Tnxb	-0.738824	0.000380028	IV
ENSMUSG00000055172	C1ra	0.802479	0.00423929	IV
ENSMUSG00000036446	Lum	0.704482	0.000721568	IV
ENSMUSG00000038456	Dennd2a	-0.680355	0.00107918	IV
ENSMUSG00000038668	Lpar1	-0.855467	0.00116058	IV
ENSMUSG00000025784	Clec3b	-1.10782	3.42134e-06	IV
ENSMUSG00000017754	Pltp	1.75802	7.19919e-13	IV
ENSMUSG00000022665	Ccdc80	-2.43071	8.42282e-08	IV
ENSMUSG00000071856	Mcc	-0.725112	0.00660082	IV
ENSMUSG00000048126	Col6a3	-1.09879	0.00307716	IV
ENSMUSG00000024440	Pcdh12	-0.921608	9.62763e-07	IV
ENSMUSG00000032593	Amigo3	-1.08503	0.000271303	IV
ENSMUSG00000031375	Bgn	-0.787914	0.000138767	IV
ENSMUSG00000030513	Pcsk6	-0.816789	9.12859e-05	IV
ENSMUSG00000022816	Fstl1	1.10324	1.30152e-07	IV
ENSMUSG00000027204	Fbn1	-0.915321	1.41246e-05	IV
ENSMUSG00000023092	Fhl1	-0.927142	2.26521e-07	IV
ENSMUSG00000026042	Col5a2	-1.85437	4.44949e-06	IV
ENSMUSG00000029718	Pcolce	0.800509	6.22085e-05	IV
ENSMUSG00000026837	Col5a1	-0.93502	1.11655e-05	IV
ENSMUSG00000026043	Col3a1	-1.61633	4.44949e-06	IV
ENSMUSG00000001119	Col6a1	2.71326	1.67357e-40	IV
ENSMUSG00000020241	Col6a2	-1.16049	1.2446e-10	IV
ENSMUSG00000033420	Antxr1	-1.27149	0.000405271	IV
ENSMUSG00000022371	Col14a1	1.13809	5.57345e-08	IV
ENSMUSG00000027386	Fbln7	0.850308	1.81022e-05	IV
ENSMUSG00000035279	Ssc5d	0.960157	0.000595735	IV
ENSMUSG00000040488	Ltbp4	-0.761051	0.0015827	IV
ENSMUSG00000020099	Unc5b	1.30627	5.26668e-11	IV
ENSMUSG00000029778	Adcyap1r1	-1.56435	6.5405e-05	IV
ENSMUSG00000025780	Itih5	-0.98628	3.31059e-06	IV
ENSMUSG00000041577	Prelp	-0.719078	0.00184452	IV
ENSMUSG00000041797	Abca9	0.85944	0.00192583	IV
ENSMUSG00000041559	Fmod	-0.675736	0.0018251	IV
ENSMUSG00000032649	Colgalt2	-0.720254	0.000274497	IV
ENSMUSG00000031740	Mmp2	-1.61071	0.000170546	IV
ENSMUSG00000031825	Crispld2	1.52326	0.000184144	IV
ENSMUSG00000029231	Pdgfra	-1.23763	5.08248e-05	IV
ENSMUSG00000041120	Nbl1	0.698616	0.00172577	IV
ENSMUSG00000032011	Thy1	-1.08671	0.000218203	IV
ENSMUSG00000023968	Crip3	-1.16005	5.49339e-07	IV
ENSMUSG00000040183	Ankrd6	-1.13365	0.00151417	IV
ENSMUSG00000014846	Tppp3	-1.47444	1.59323e-15	IV
ENSMUSG00000013584	Aldh1a2	-1.85774	6.43867e-16	IV
ENSMUSG00000020363	Gfpt2	-1.80525	1.40674e-10	IV
ENSMUSG00000019997	Ctgf	1.63209	3.65485e-11	IV
ENSMUSG00000020467	Efemp1	2.33902	1.47898e-10	IV
ENSMUSG00000043155	Hpdl	0.684671	0.00239303	IV
ENSMUSG00000067786	Nnat	-1.24079	0.00616503	IV
ENSMUSG00000028108	Ecm1	-0.900628	2.54339e-05	IV
ENSMUSG00000023046	Igfbp6	-1.7315	2.01606e-07	IV
ENSMUSG00000028128	F3	-1.12696	2.64505e-05	IV
ENSMUSG00000021822	Plau	1.79496	9.26041e-09	IV
ENSMUSG00000002602	Axl	-2.54704	7.45263e-30	IV
ENSMUSG00000021876	Rnase4	1.13248	9.88338e-09	IV
ENSMUSG00000024011	Pi16	1.01098	5.51906e-07	IV
ENSMUSG00000034675	Dbn1	-0.700416	0.000531021	IV
ENSMUSG00000079105	C7	-1.21861	0.00769131	IV
ENSMUSG00000030787	Lyve1	1.1788	0.000110773	IV
ENSMUSG00000002847	Pla1a	2.79904	4.67991e-28	IV
ENSMUSG00000044017	Adgrd1	-0.697418	0.00249587	IV
ENSMUSG00000063415	Cyp26b1	-1.52449	0.00602055	IV
ENSMUSG00000004939	Nmrk2	2.68745	6.96064e-22	IV
ENSMUSG00000036902	Neto2	0.708092	0.00075568	IV
ENSMUSG00000059824	Dbp	0.620461	0.00549125	IV
ENSMUSG00000071656	Lrrn4cl	-0.953437	0.00653845	IV
ENSMUSG00000031538	Plat	-0.799344	0.000158544	IV
ENSMUSG00000032332	Col12a1	0.759685	0.00025423	IV
ENSMUSG00000033318	Gstt2	-1.13454	0.000374393	IV
ENSMUSG00000013936	Myl2	1.57542	8.88321e-16	IV
ENSMUSG00000038776	Ephx1	0.727236	0.00118148	IV
ENSMUSG00000025723	Nmb	-1.3936	3.10961e-06	IV
ENSMUSG00000028268	Gbp3	-1.57999	2.6698e-05	IV
ENSMUSG00000027016	Zfp385b	1.0093	1.35018e-05	IV
ENSMUSG00000067276	Capn6	0.597364	0.00613226	IV
ENSMUSG00000031253	Srpx2	0.779345	0.000126306	IV
ENSMUSG00000079428	Tceal7	-0.874359	0.00773547	IV
ENSMUSG00000035578	Iqcg	-1.05546	0.000660544	IV
ENSMUSG00000097184	4632428C04Rik	0.599299	0.00940262	IV
