# Supplementary material for: MicroRNA-mRNA Co-sequencing Identifies Transcriptional and Post-transcriptional Regulatory Networks Underlying Muscle Wasting in Cancer Cachexia
Source: Preprints.org preprint supplement (doi:10.20944/preprints201909.0004.v1), 2019-09-01
Supplement: Supplementary file 2 [file Supplementary Table 3_DEG miRNA.xlsx]

## Sheet: miRNA_DE
miRNA	log2FoldChange	FDR
mmu-miR-10b-5p	1.34519	0.00103494
mmu-miR-1249-3p	1.08444	0.00156292
mmu-miR-144-3p	-0.781177	0.023354
mmu-miR-144-5p	-0.916852	0.0147839
mmu-miR-146a-5p	0.655348	0.0957464
mmu-miR-146b-5p	0.938808	0.0296138
mmu-miR-181c-3p	-0.883466	0.0296138
mmu-miR-183-5p	1.03746	0.167842
mmu-miR-1843a-3p	1.20191	0.0171607
mmu-miR-223-3p	0.826293	0.015426
mmu-miR-29b-3p	0.771213	0.015272
mmu-miR-338-5p	0.823718	0.108898
mmu-miR-350-3p	0.937329	0.0299917
mmu-miR-3535	0.792146	0.167842
mmu-miR-379-3p	-0.966246	0.312434
mmu-miR-382-5p	0.554781	0.311094
mmu-miR-451a	-0.748832	0.0140045
mmu-miR-671-3p	0.596707	0.0962094
